# Supplementary material
Source: MDPI journal article supplement (https://www.mdpi.com/2079-6412/10/8/736)

# Supplementary Materials: The Effect of Charged Ag Nanoparticles on Thin Film Growth during DC Magnetron Sputtering

Gil-Su Jang, Du-Yun Kim and Nong-Moon Hwang \*

Department of Material Science and Engineering, College of Engineering at Seoul National University, 1 Gwanak-ro, Gwanak-gu, Seoul 08826, Korea; gsjang@snu.ac.kr (G.-S.J.); kdy9271@snu.ac.kr (D.-Y.K.)

\* Correspondence: nmhwang@snu.ac.kr; Tel: +82-2-880-8922

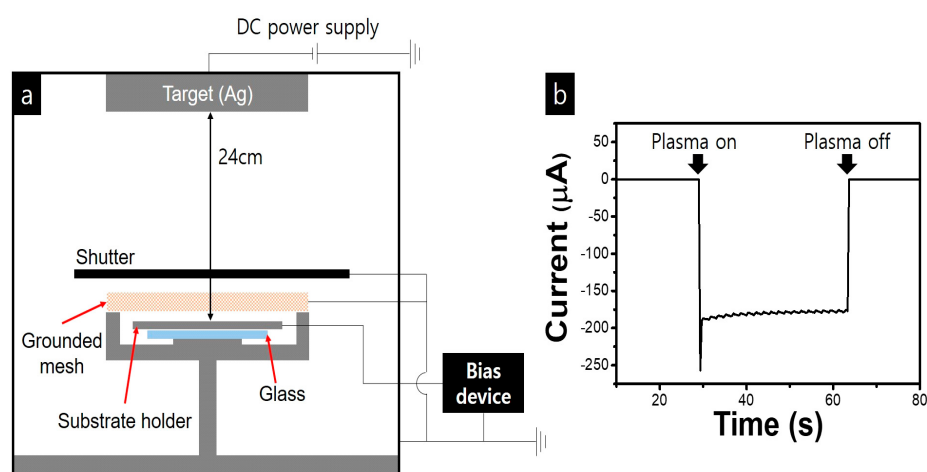

**Figure S1.** Gaussian graphs for the size distribution of Ag nanoparticles under each capture condition.

© 2020 by the authors. Licensee MDPI, Basel, Switzerland. This article is an open access article distributed under the terms and conditions of the Creative Commons Attribution (CC BY) license (<http://creativecommons.org/licenses/by/4.0/>).

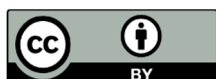

Supplement: s1 [file s1]
